# Supplementary material for: The New Carotenoid Pigment Moraxanthin Is Associated with Toxic Microalgae
Source: Mar Drugs. 2011 Feb 10;9(2):242–55. doi: 10.3390/md9020242 (PMC3093255; doi:10.3390/md9020242)

# The New Carotenoid Pigment Moraxanthin is Associated with a Toxic Microalgae

Olga Mangoni,<sup>1</sup> Concetta Imperatore,<sup>2</sup> Carmelo R. Tomas,<sup>3</sup> Valeria Costantino,<sup>2</sup> Vincenzo Saggiomo,<sup>4</sup> Alfonso Mangoni<sup>2,\*</sup>

<sup>1</sup> Dipartimento delle Scienze Biologiche, Università di Napoli Federico II, Via Mezzocannone 8, 80134, Napoli, Italy

<sup>2</sup> Dipartimento di Chimica delle Sostanze Naturali, Università di Napoli Federico II, via D. Montesano 49, 80131 Napoli, Italy

<sup>3</sup> Center for Marine Science, University of North Carolina at Wilmington, 5600 Marvin K. Moss Lane, Wilmington, NC 28409, USA

<sup>4</sup> Stazione Zoologica "A. Dohrn", Villa Comunale I, 80121 Napoli, Italy

## ELECTRONIC SUPPLEMENTARY INFORMATION

### Table of contents

|                                                             |     |
|-------------------------------------------------------------|-----|
| ESI mass spectrum of moraxanthin (1).....                   | S2  |
| CD spectrum of moraxanthin (1) .....                        | S2  |
| <sup>1</sup> H-NMR spectrum of moraxanthin (1) .....        | S3  |
| COSY spectrum of moraxanthin (1).....                       | S4  |
| COSY spectrum of moraxanthin (1) – high-field region.....   | S5  |
| COSY spectrum of moraxanthin (1) – low-field region.....    | S6  |
| HSQC spectrum of moraxanthin (1) – high-field region.....   | S7  |
| HSQC spectrum of moraxanthin (1) – mid-field region.....    | S8  |
| HSQC spectrum of moraxanthin (1) – low-field region.....    | S9  |
| HMBC spectrum of moraxanthin (1).....                       | S10 |
| HMBC spectrum of moraxanthin (1) – high-field region.....   | S11 |
| HMBC spectrum of moraxanthin (1) – low-field region.....    | S12 |
| ROESY spectrum of moraxanthin (1) .....                     | S13 |
| ROESY spectrum of moraxanthin (1) – high-field region ..... | S14 |

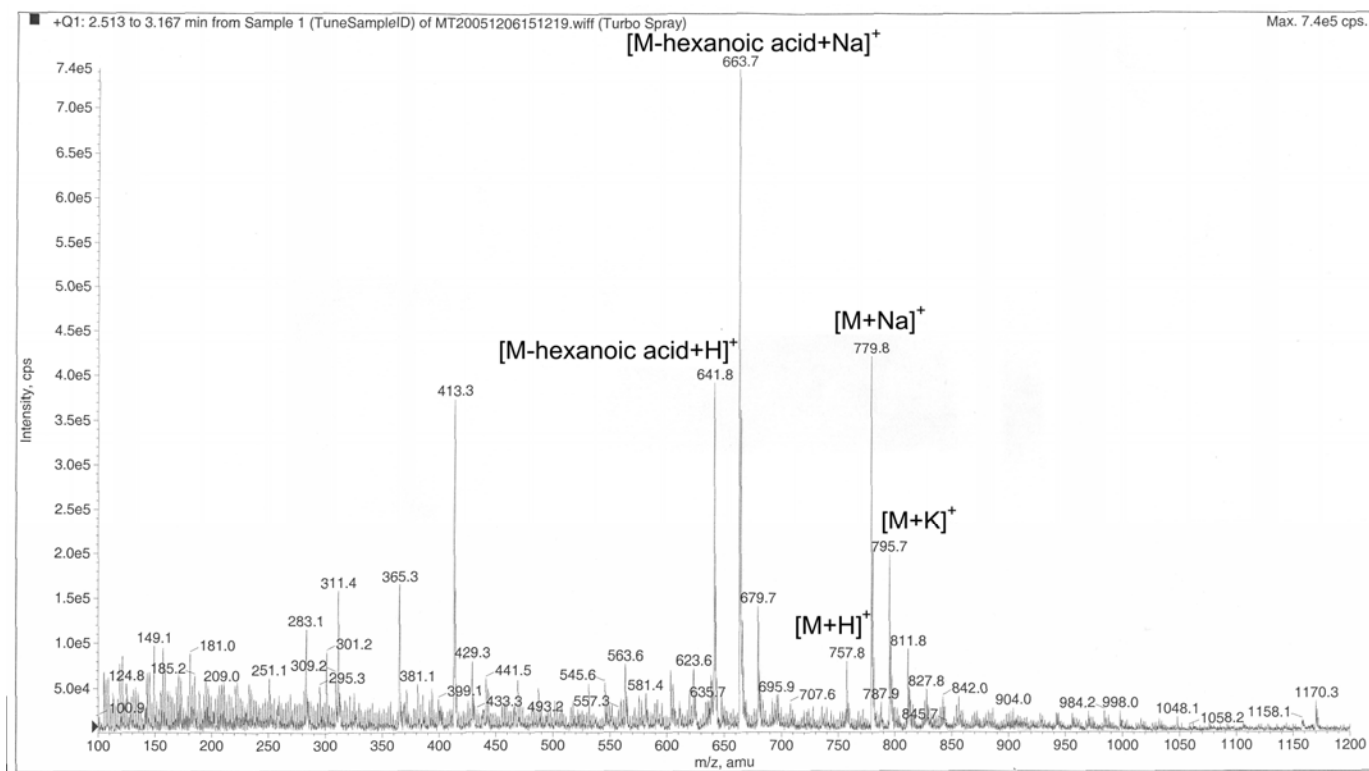

Moraxanthin (**1**). ESI MS spectrum

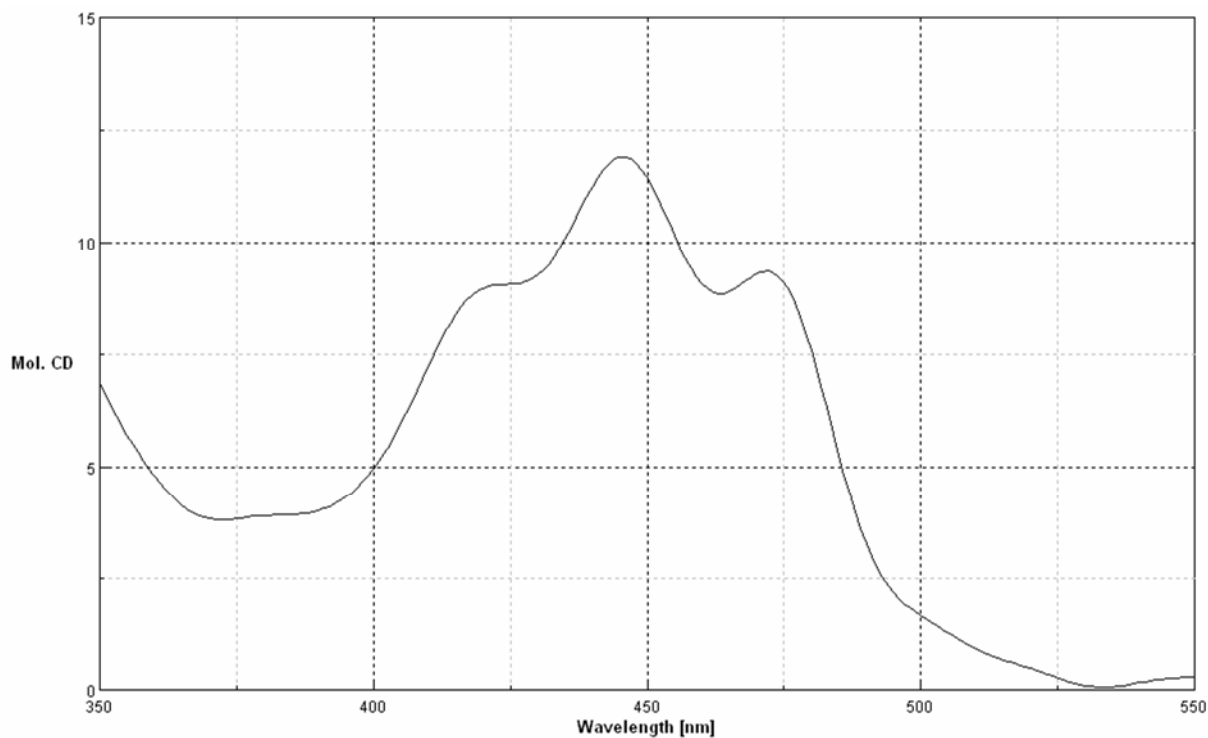

Moraxanthin (**1**). CD spectrum (MeOH)



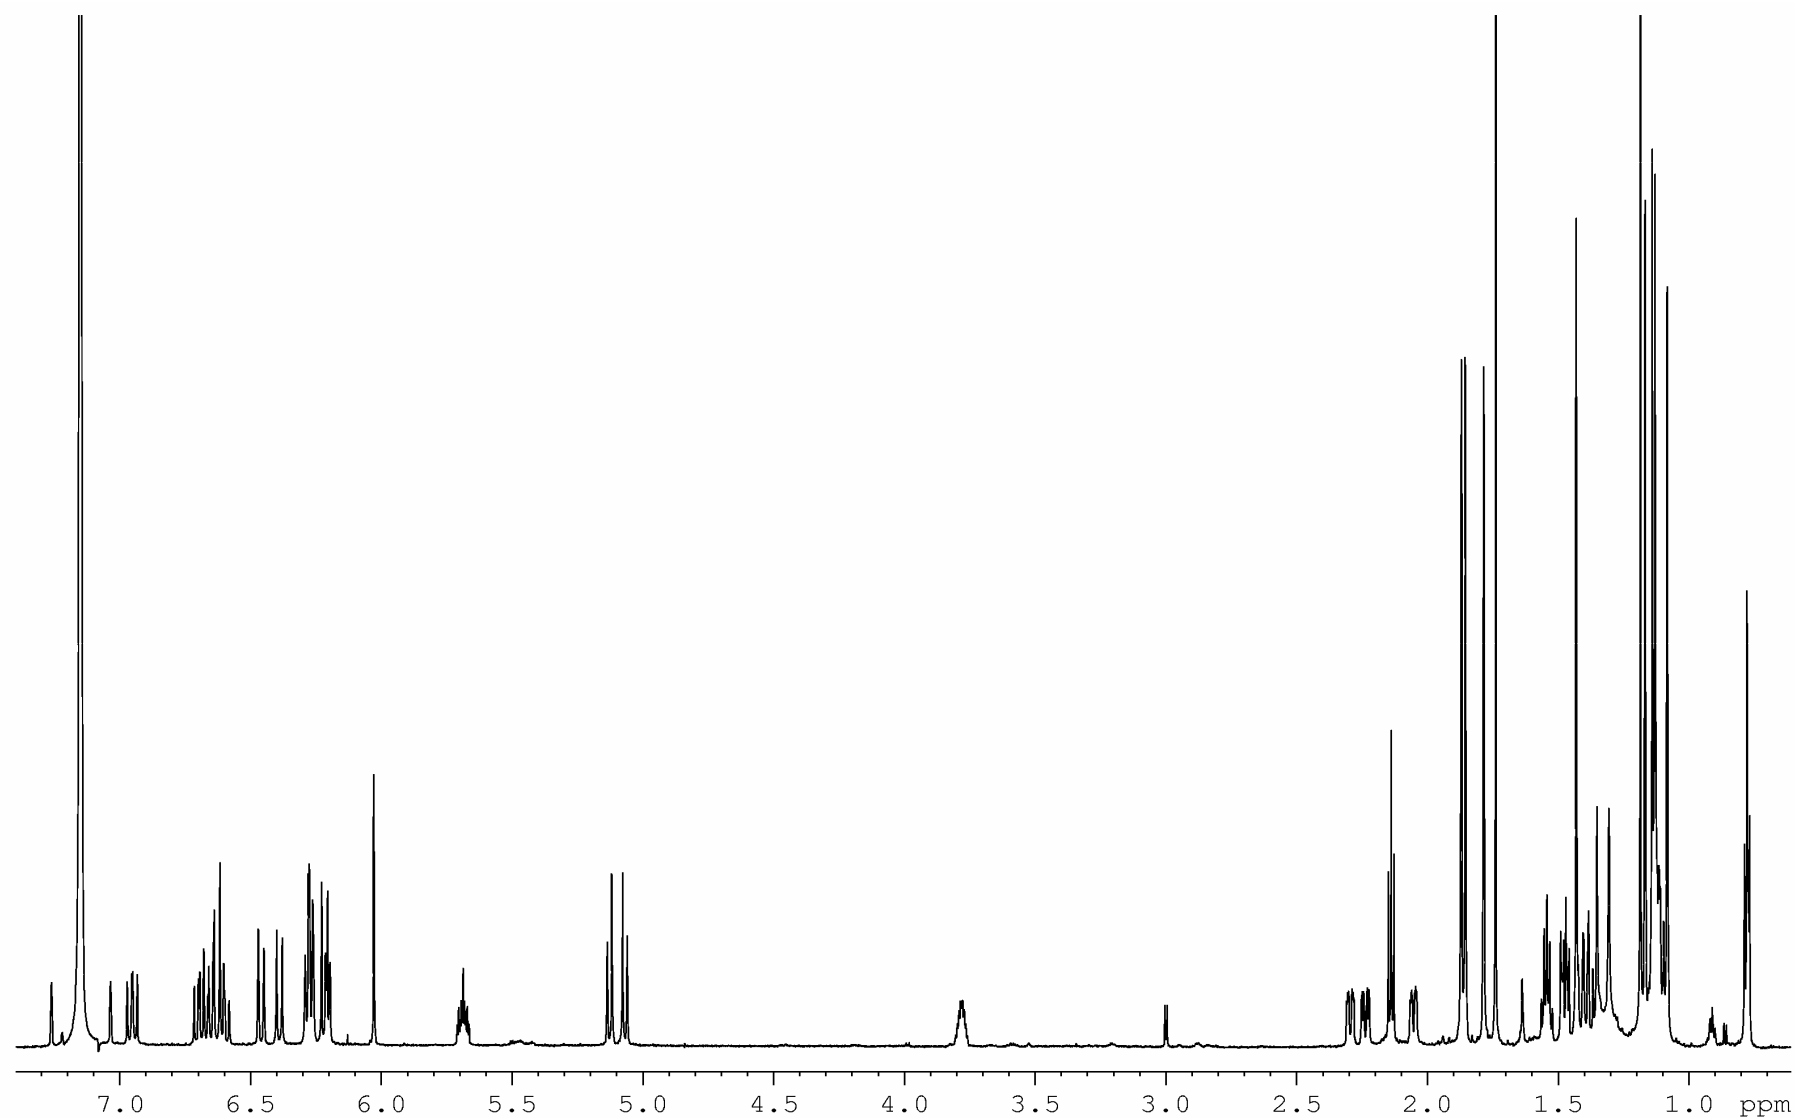

Moraxanthin (**1**) –  $^1\text{H}$  NMR spectrum ( $\text{C}_6\text{C}_6$ , 700 MHz)

Olga Mangoni, Concetta Imperatore, Carmelo R. Tomas, Valeria Costantino, Vincenzo Saggiomo, Alfonso Mangoni

The new carotenoid pigment moraxanthin is associated with a toxic microalgae

*Electronic Supplementary Information*

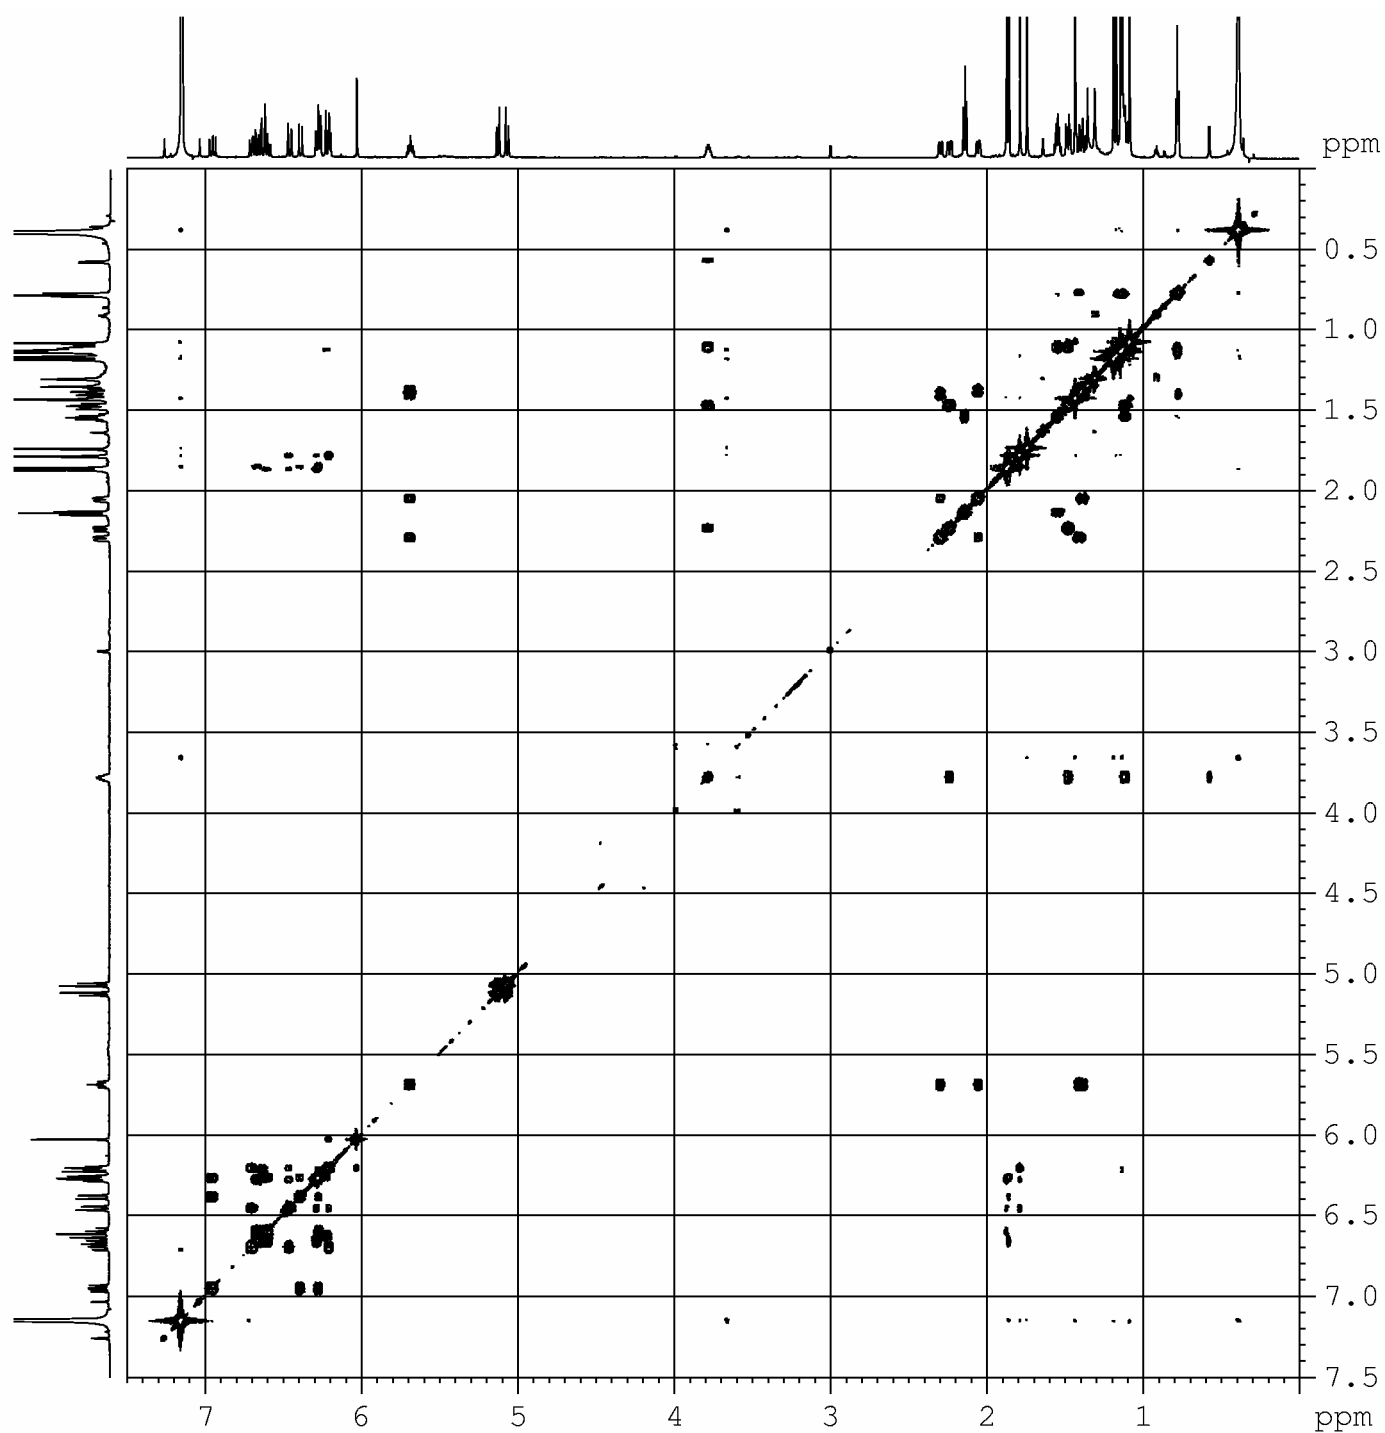

Moraxanthin (**1**) – COSY spectrum ( $\text{C}_6\text{Cl}_6$ , 700 MHz)

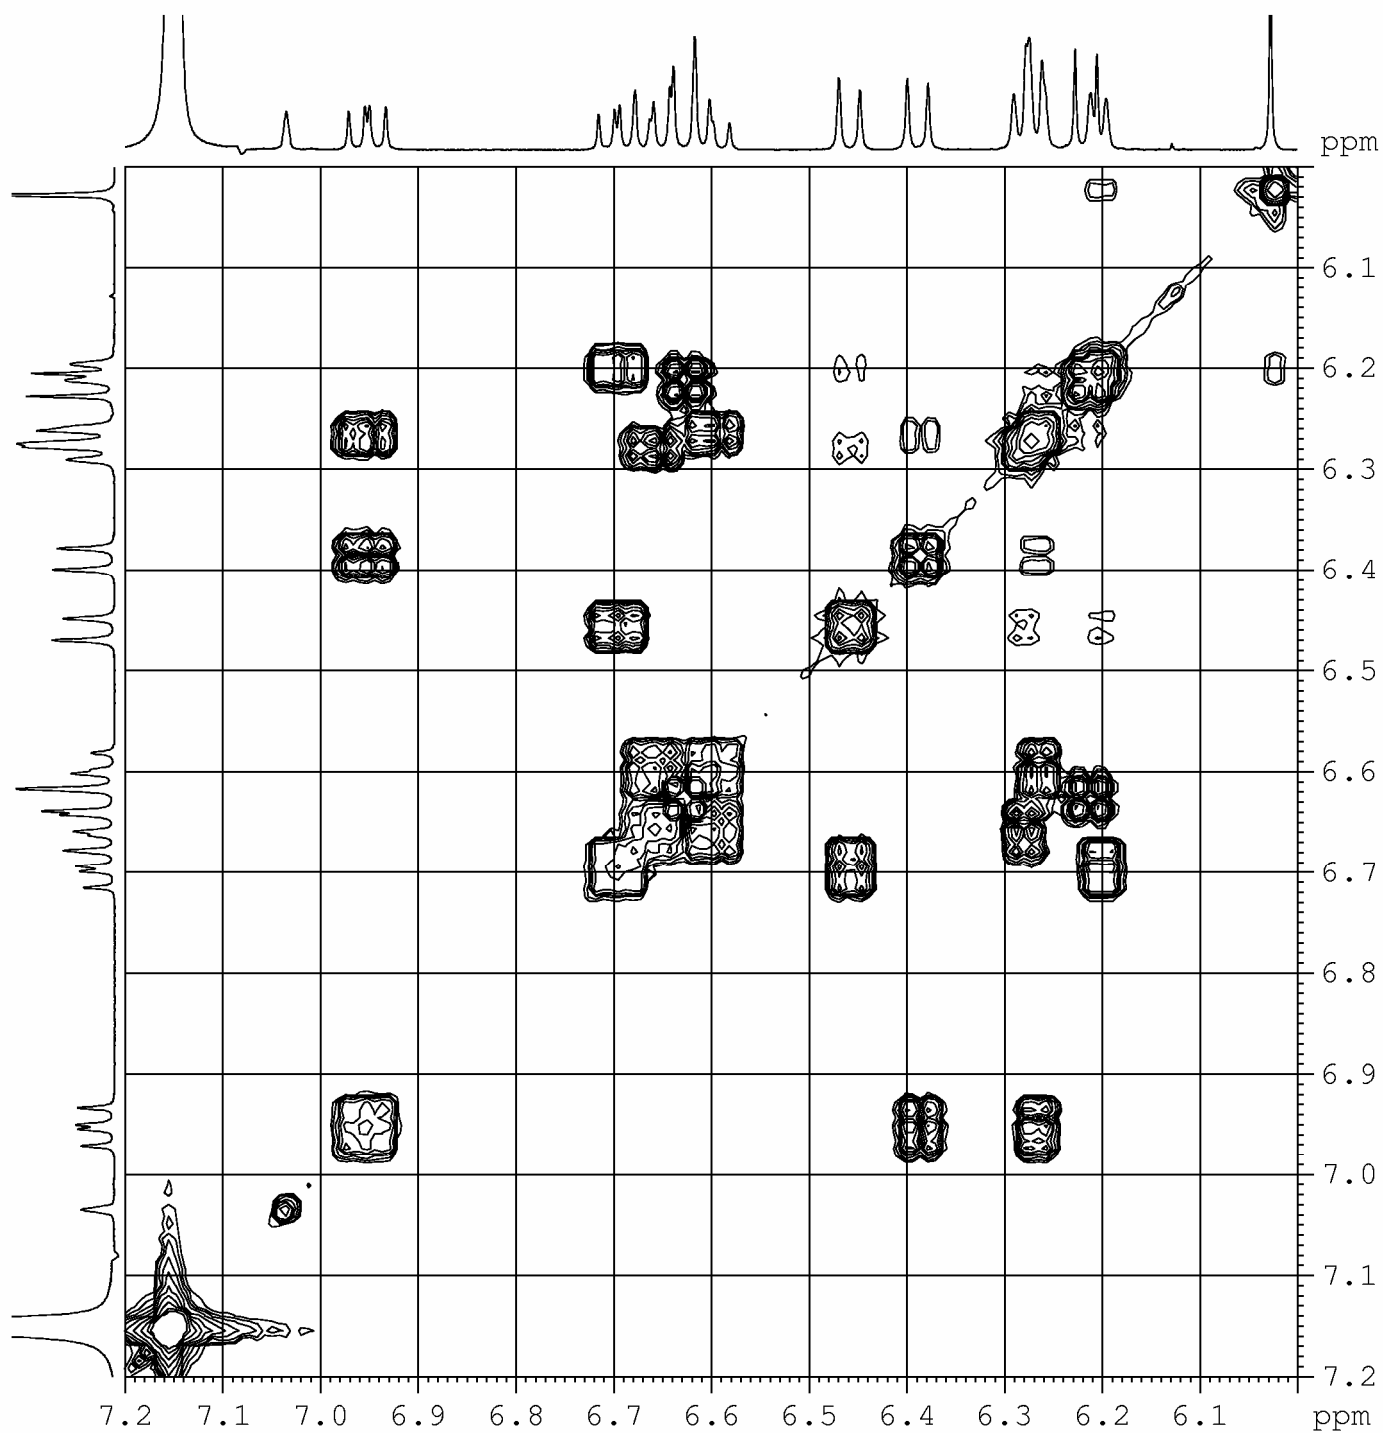

Moraxanthin (1) – COSY spectrum ( $C_6D_6$ , 700 MHz) – low-field region

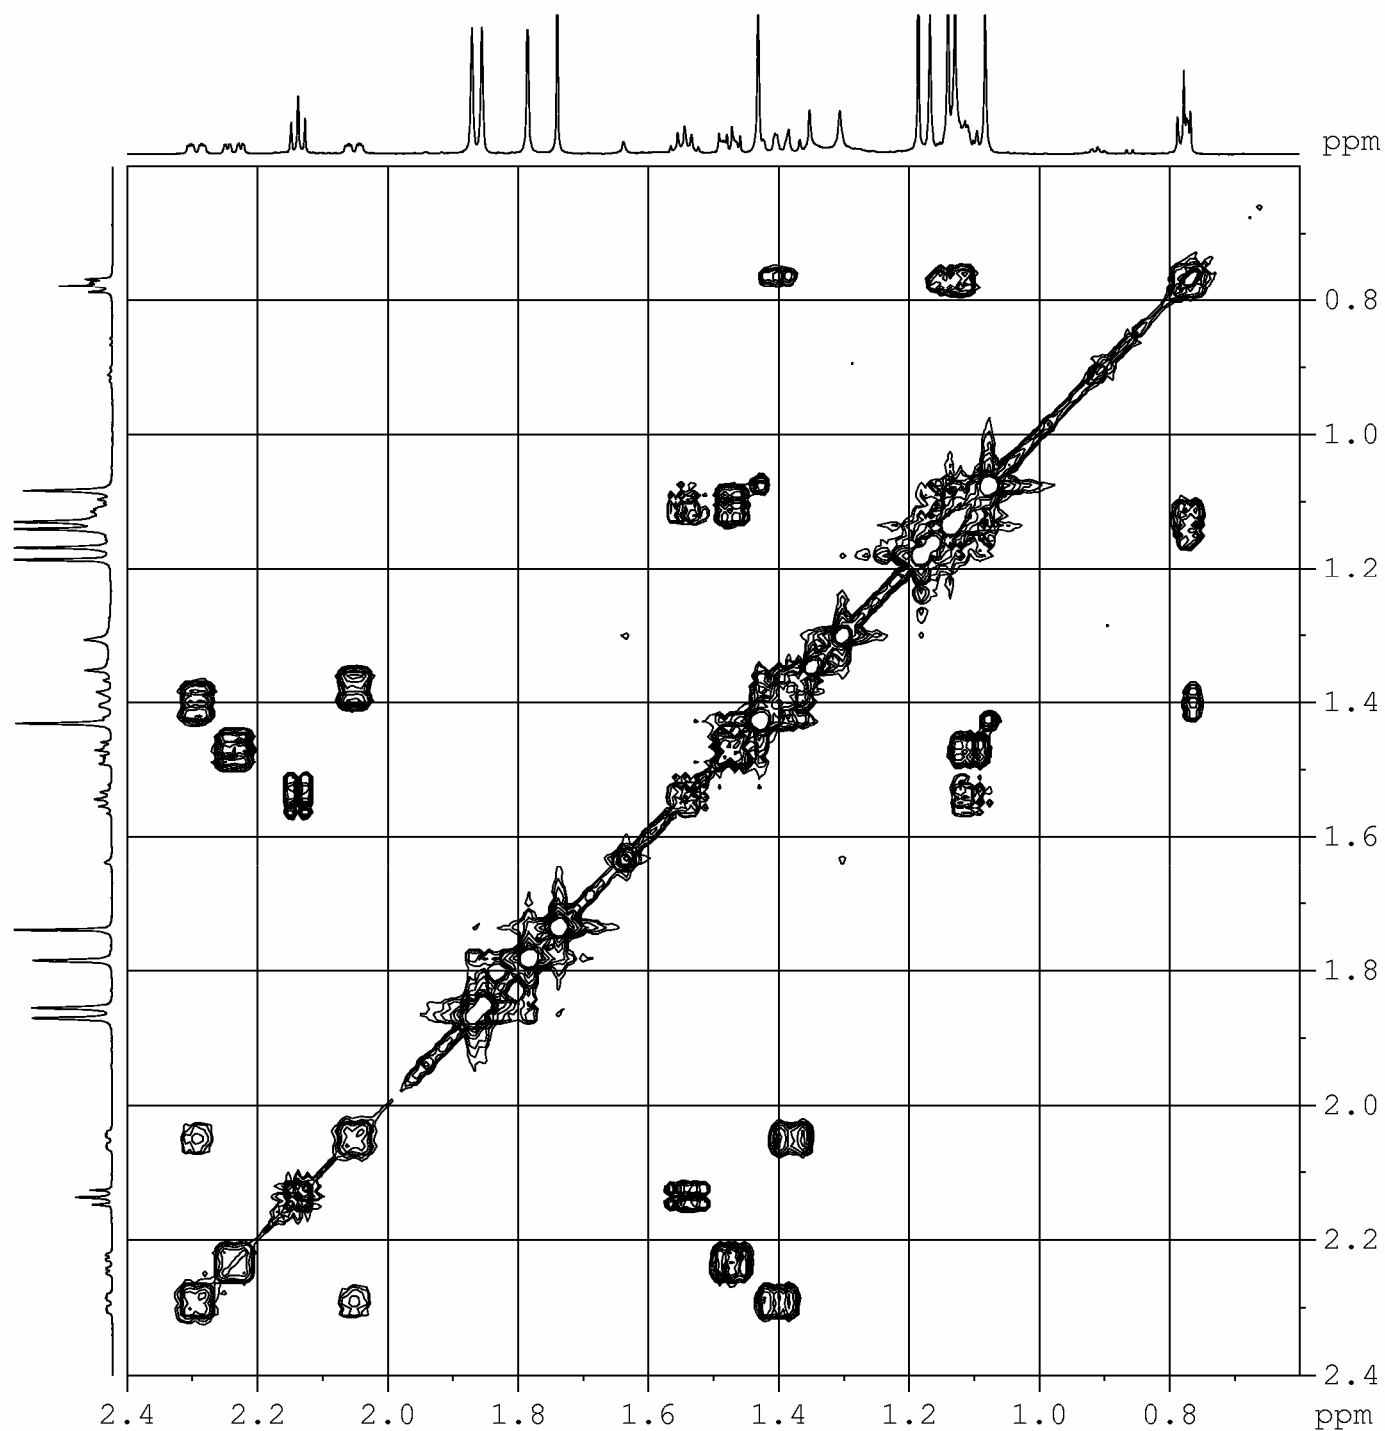

Moraxanthin (1) – COSY spectrum ( $C_6D_6$ , 700 MHz) – high-field region

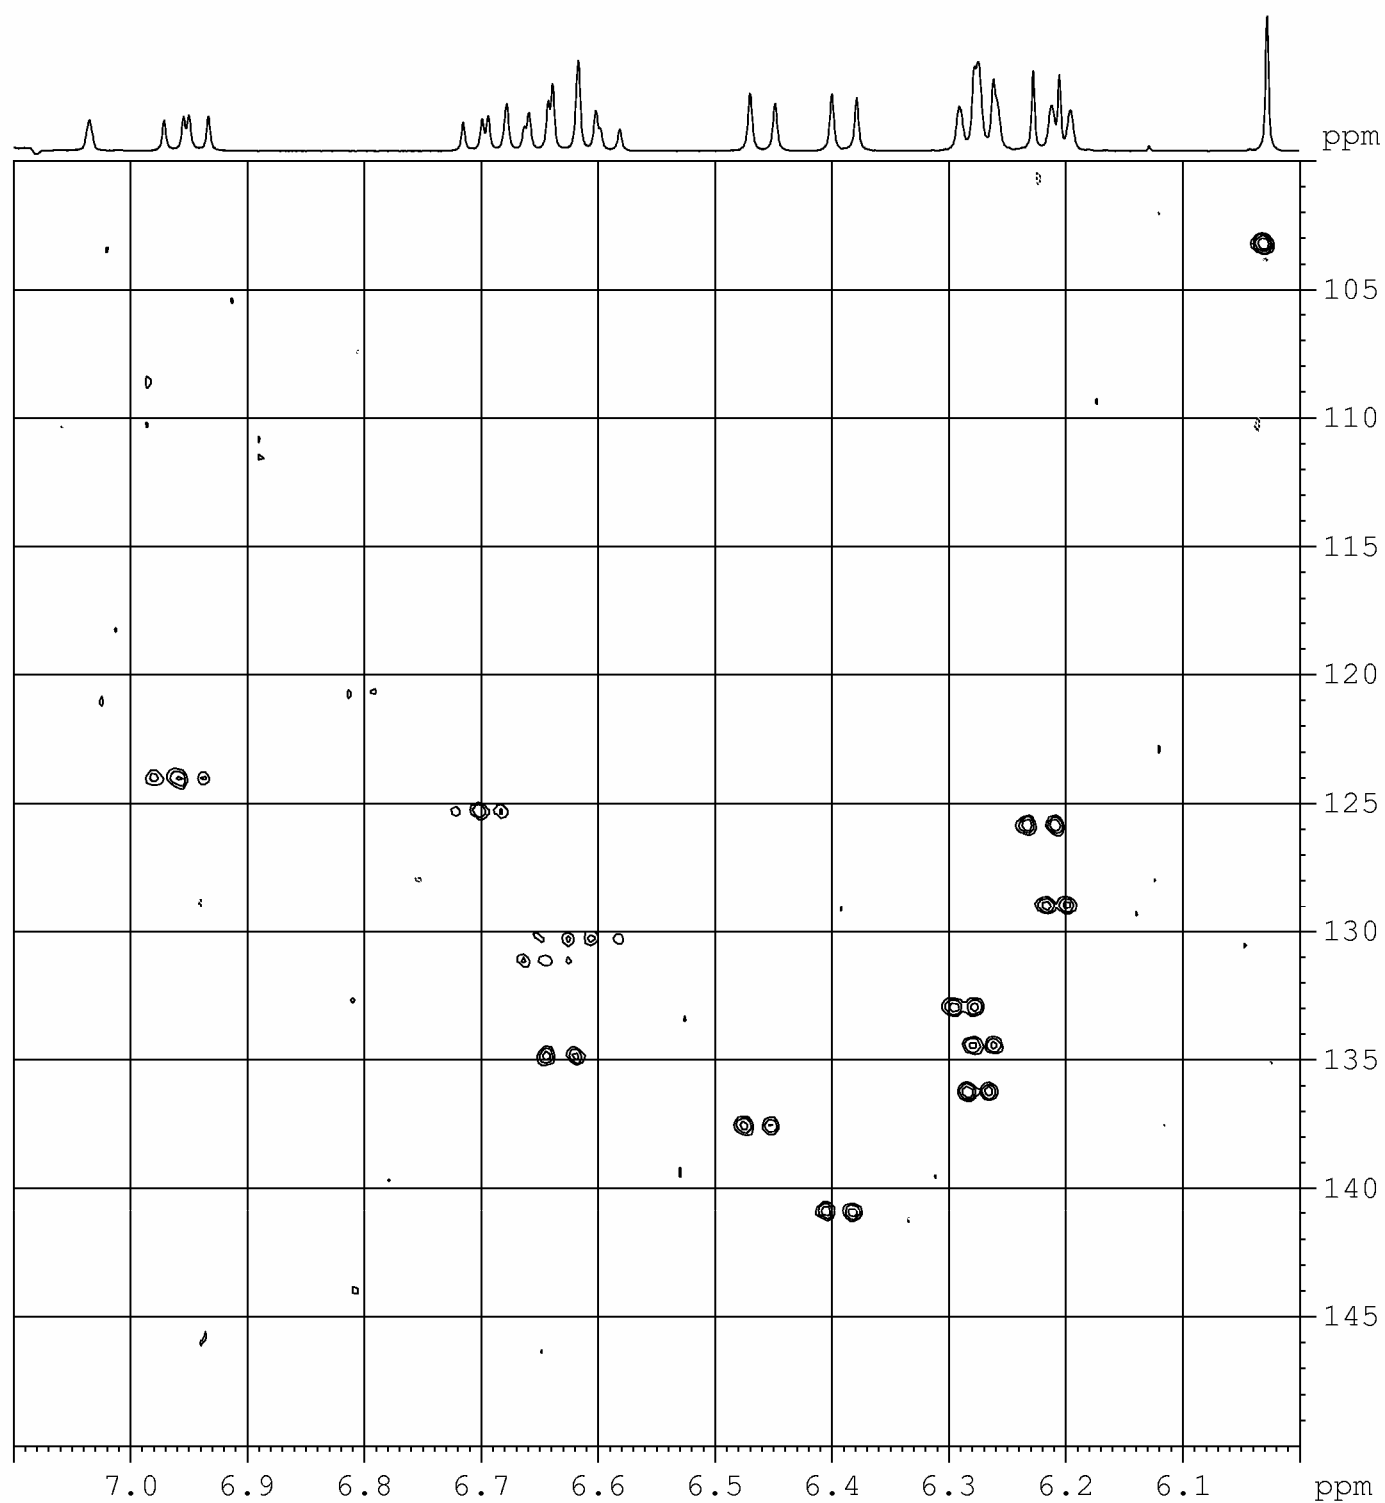

Moraxanthin (1) – HSQC spectrum ( $C_6D_6$ , 700 MHz) – low-field region

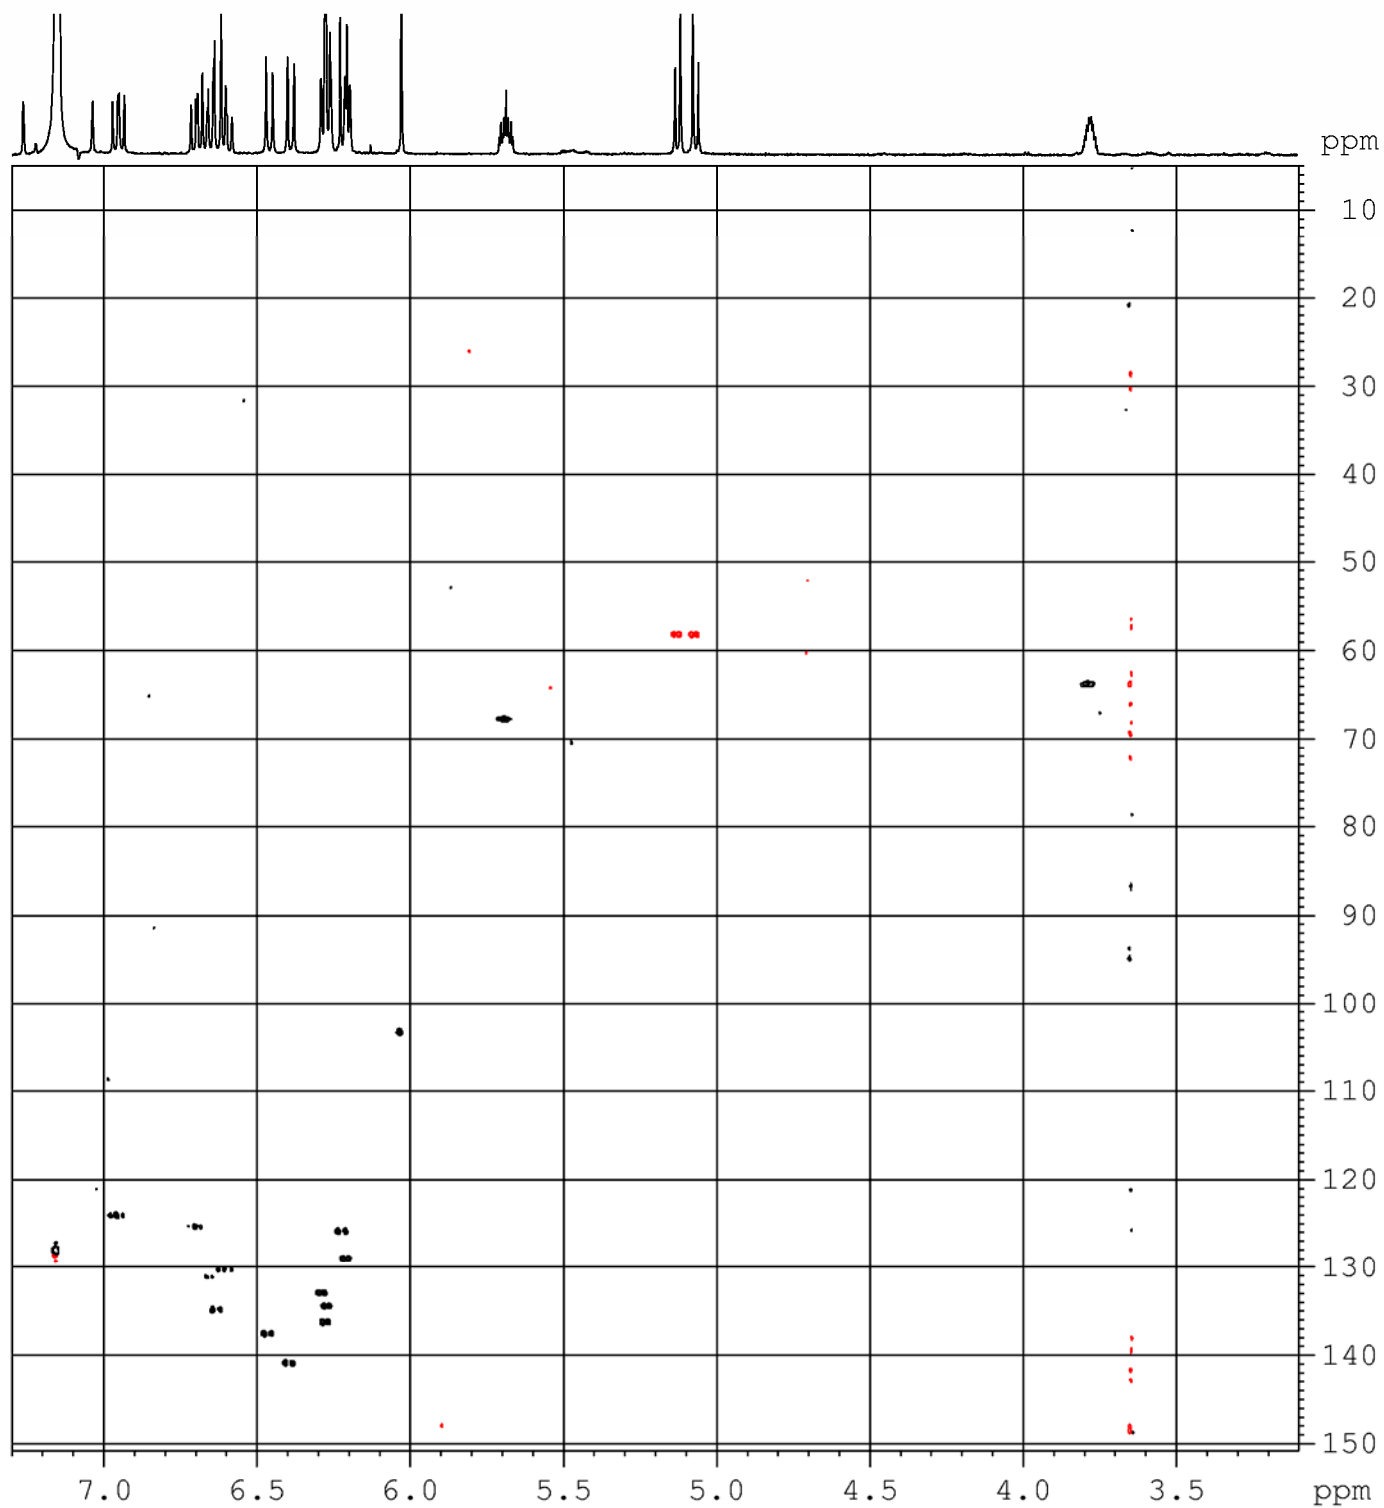

Moraxanthin (1) – HSQC spectrum ( $C_6D_6$ , 700 MHz) – middle-field region

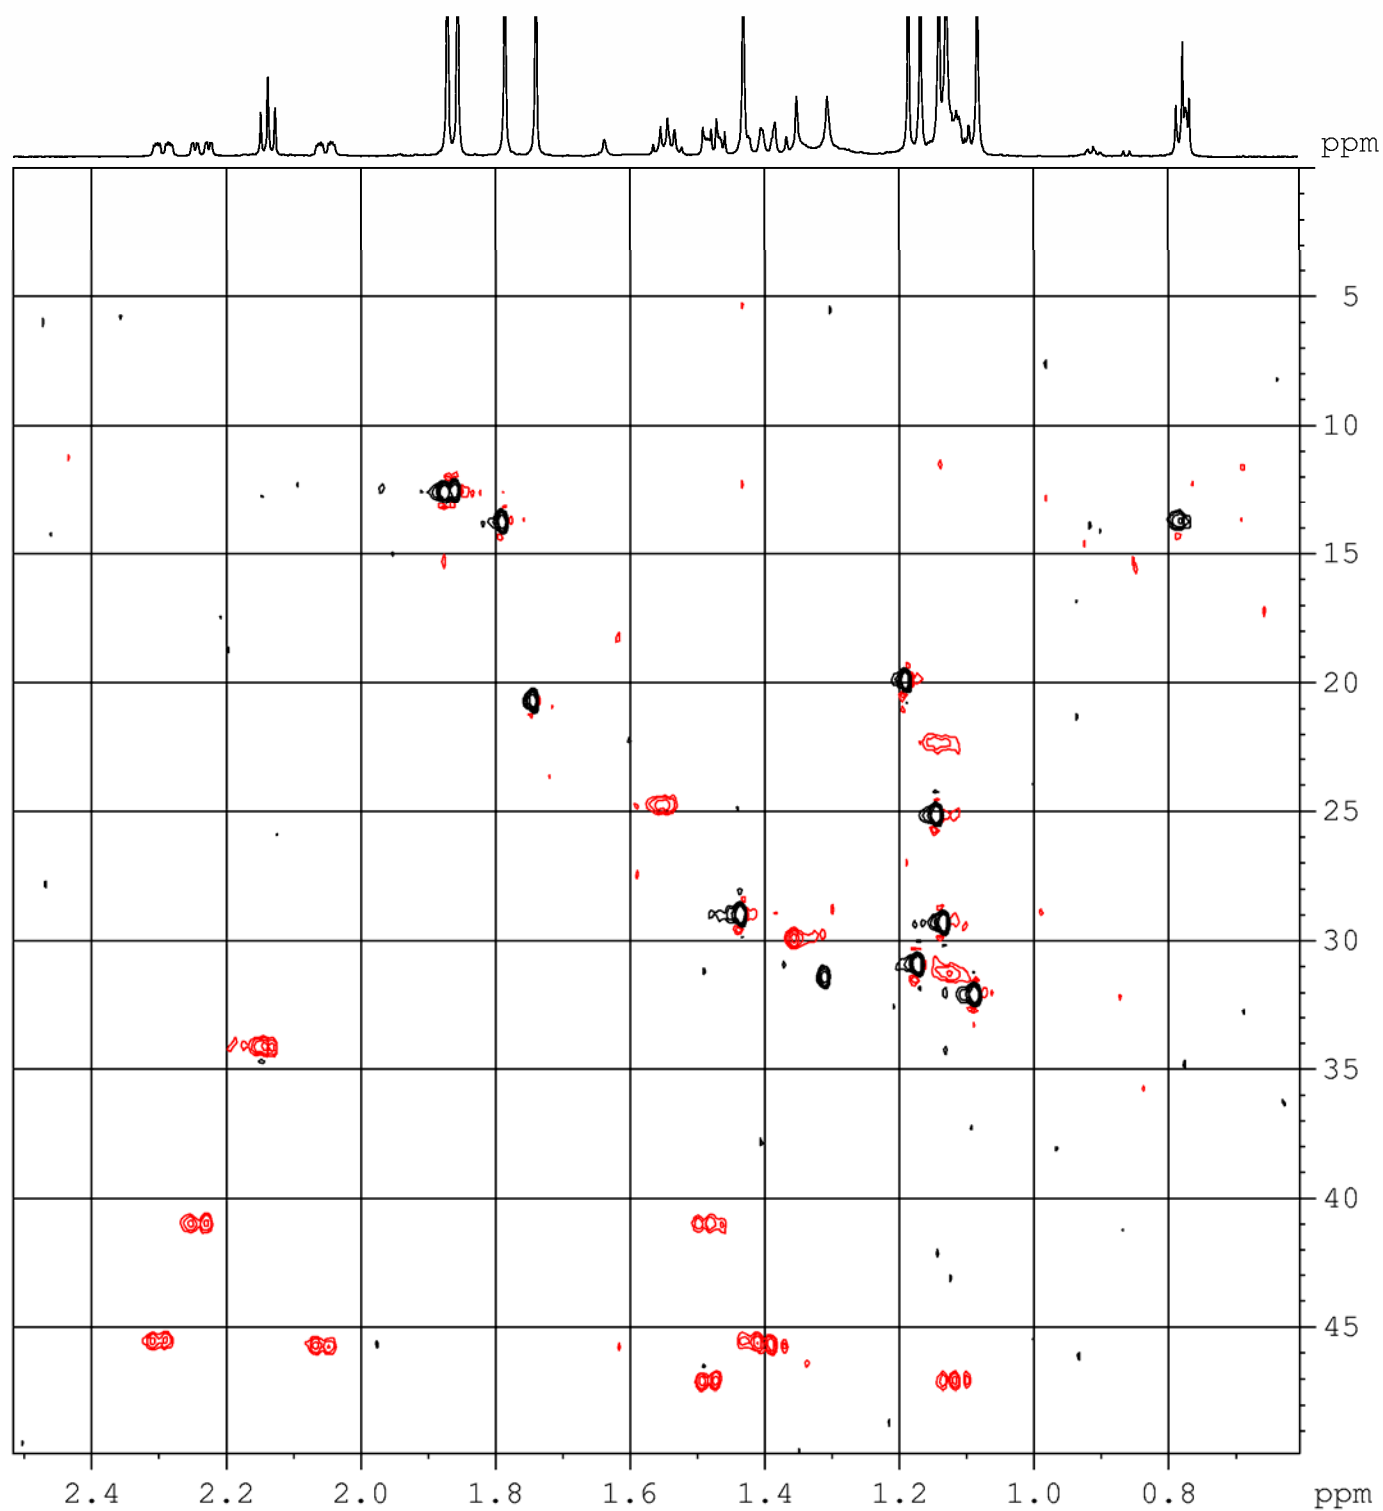

Moraxanthin (1) – HSQC spectrum ( $C_6D_6$ , 700 MHz) – high-field region

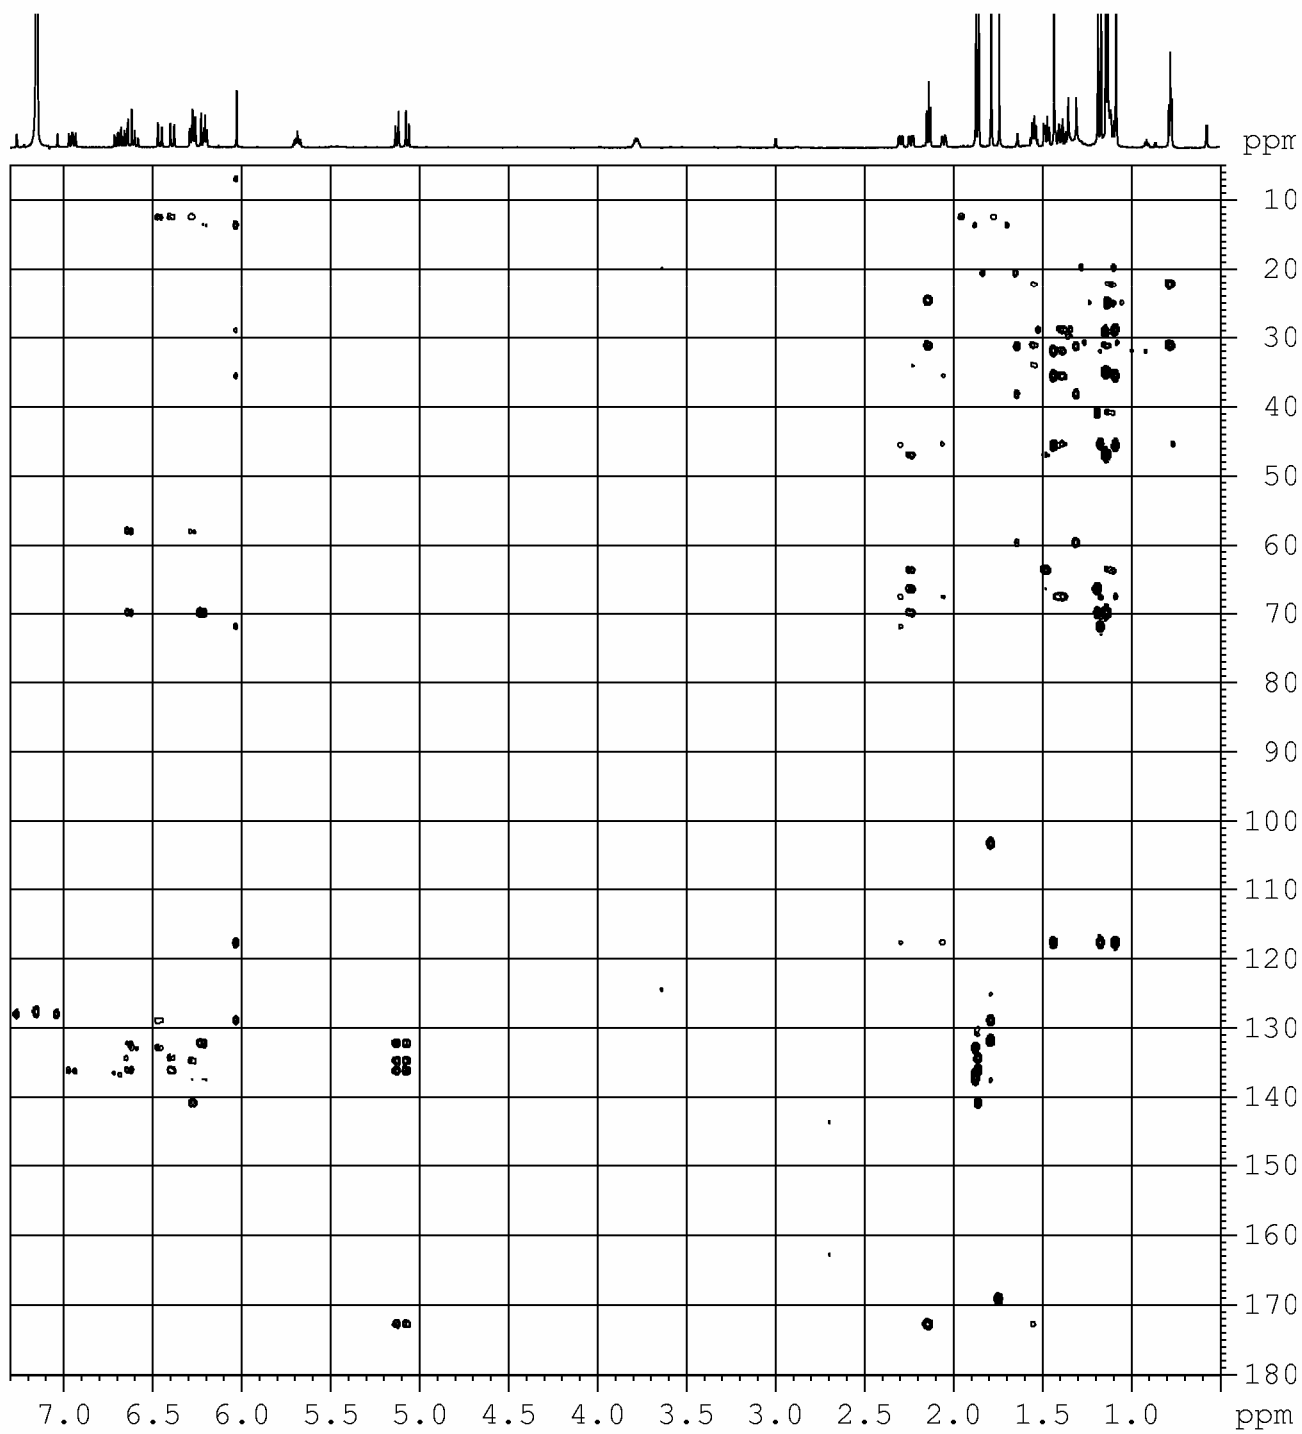

Moraxanthin (**1**) – HMBC spectrum ( $\text{C}_6\text{D}_6$ , 700 MHz)

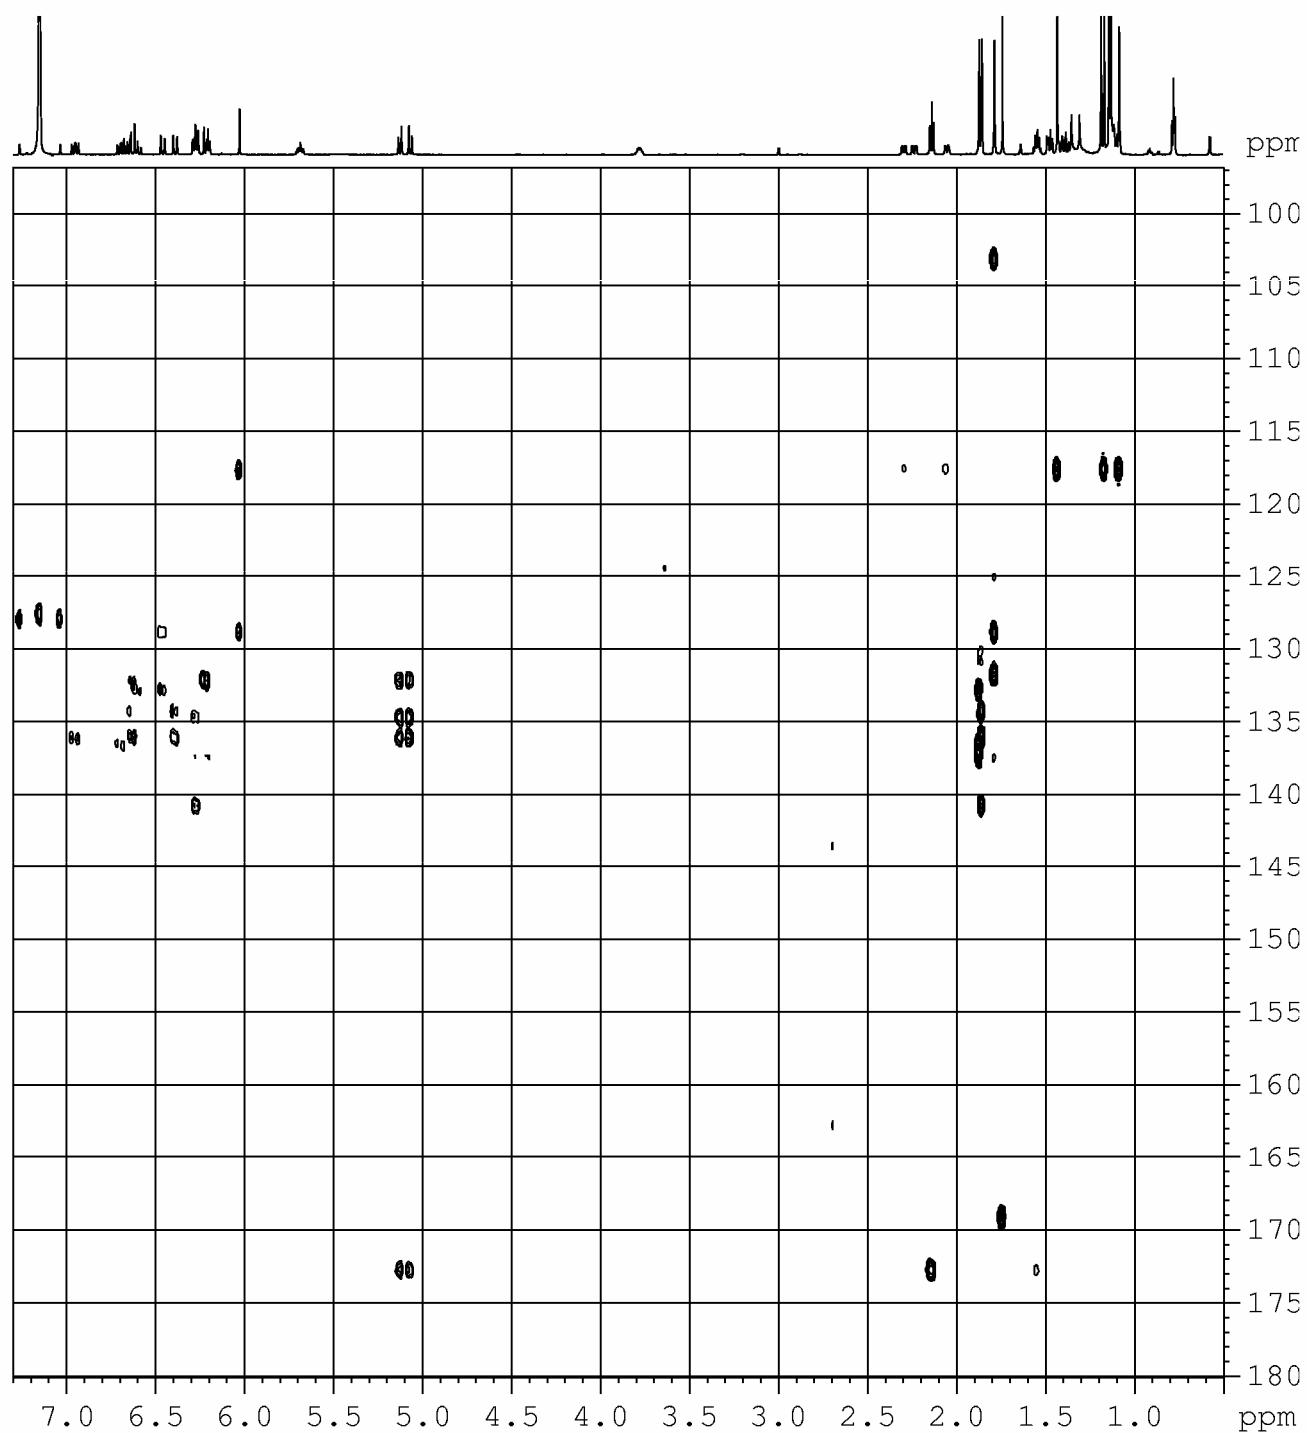

Moraxanthin (1) – HMBC spectrum (C<sub>6</sub>D<sub>6</sub>, 700 MHz) – low-field region

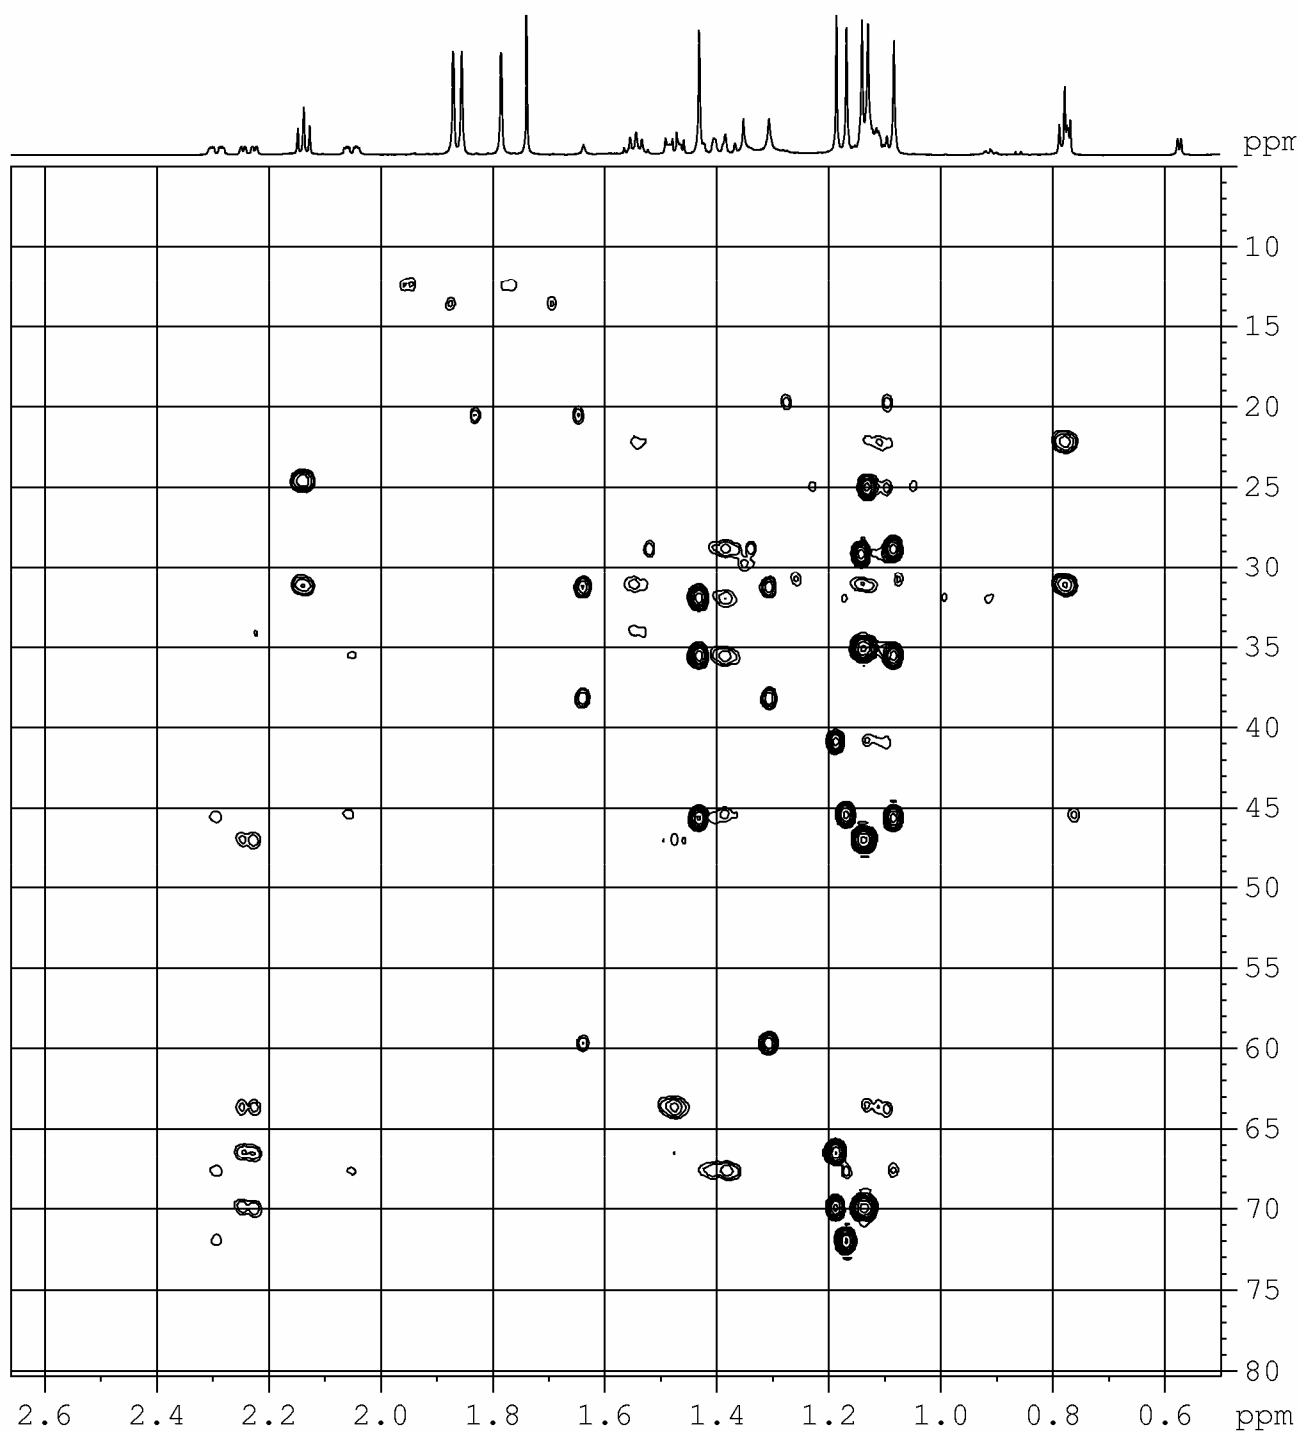

Moraxanthin (1) – HMBC spectrum ( $\text{C}_6\text{D}_6$ , 700 MHz) – high-field region

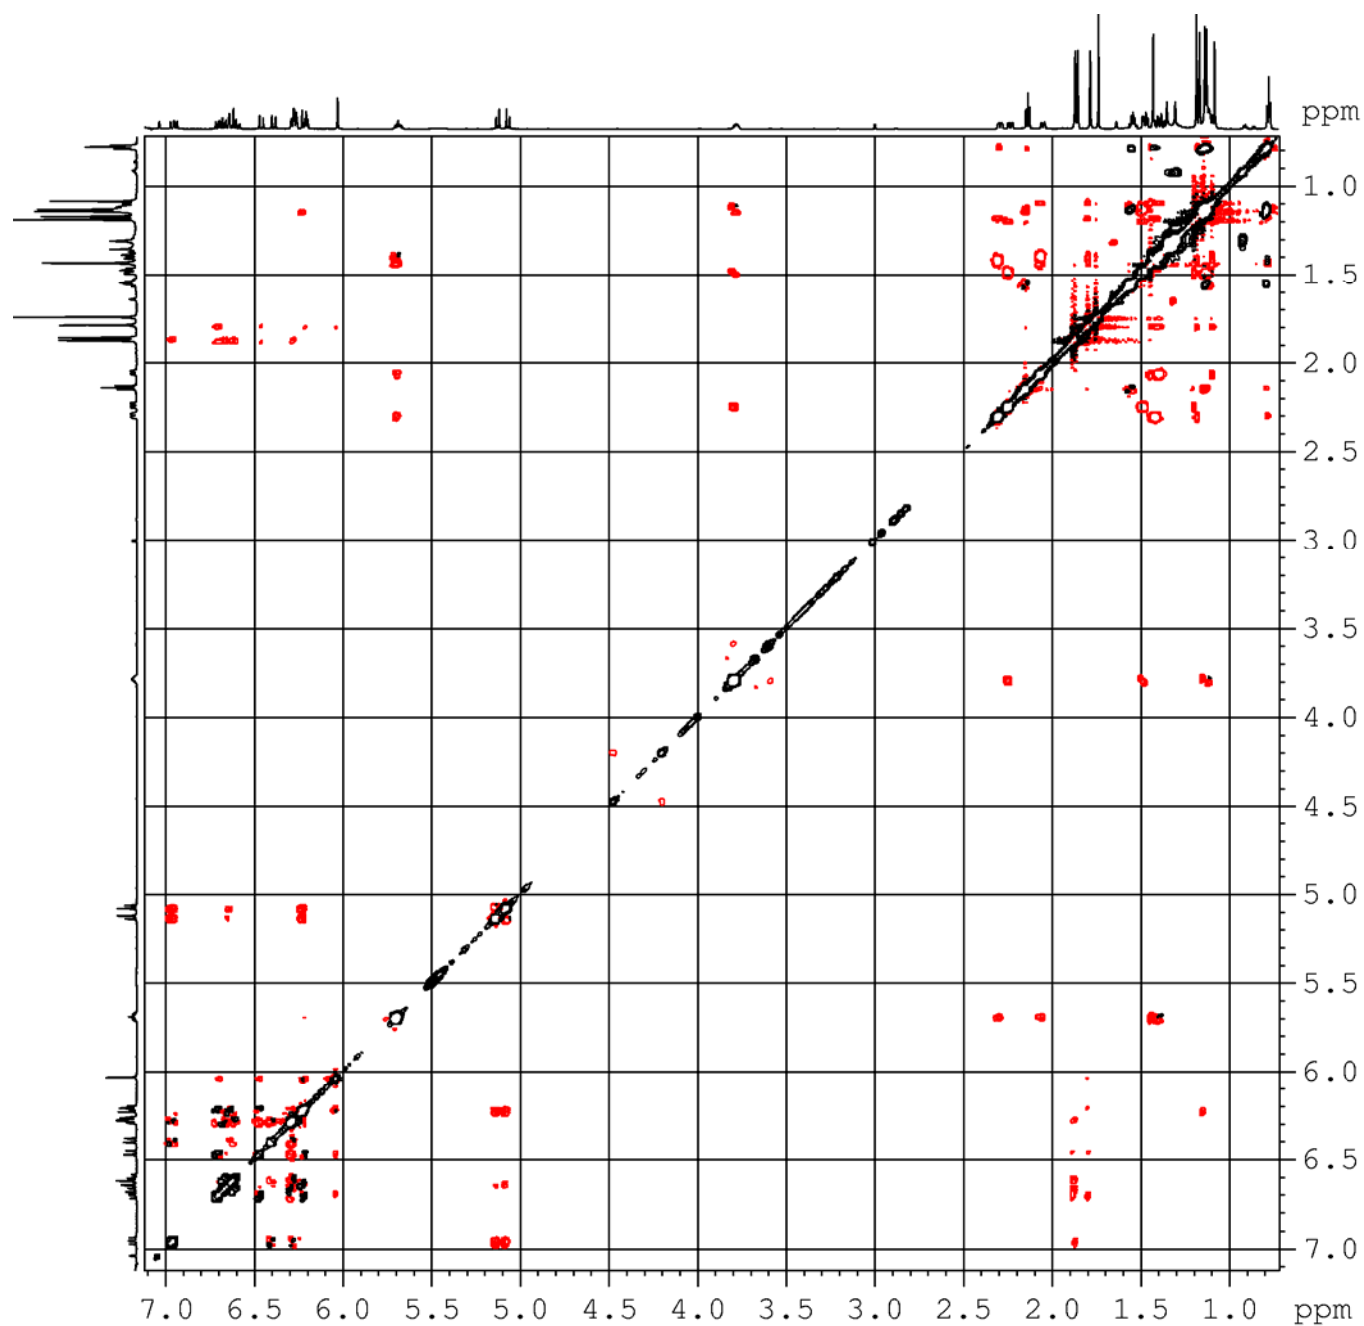

Moraxanthin (1) – ROESY spectrum ( $C_6D_6$ , 700 MHz)

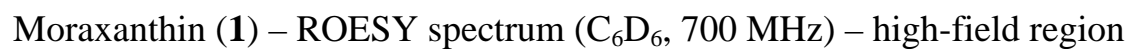

Supplement: Supplementary File 1 — Supplementary file (PDF, 424 KB) Description: Supplementary Information [file marinedrugs-09-242-s001.pdf]
